# Supplementary material for: Microporous polycarbazole frameworks with large conjugated π systems for cyclohexane separation from cyclohexane-containing mixtures
Source: Royal Society of Chemistry journal article supplement (doi:10.1039/d1nj04968b), 2021-01-01
Supplement: d1nj04968b1.pdf [file d1nj04968b1.pdf]

## Electronic Supplementary Material (ESI) for New Journal of Chemistry.

### Supporting Information

## Microporous Polycarbazole Frameworks with Large Conjugated $\pi$ System for Cyclohexane Separation from Cyclohexane-Containing Mixtures

Liangji Chen,<sup>a</sup> Hao Zhang,<sup>a</sup> Yingxiang Ye,<sup>a</sup> Zhen Yuan,<sup>a</sup> Jiaqi Wang,<sup>a</sup> Yisi Yang,<sup>a</sup> Si Lin,<sup>a</sup> Fahui Xiang,<sup>a</sup>

Shengchang Xiang\*<sup>a</sup> and Zhangjing Zhang\*<sup>a</sup>

*a. Fujian Provincial Key Laboratory of Polymer Materials, College of Chemistry and Materials Science, Fujian Normal University, 32 Shangsan Road, Fuzhou 350007, PR China*

### CONTENTS

|                                                                                                                                                                                                                                        |           |
|----------------------------------------------------------------------------------------------------------------------------------------------------------------------------------------------------------------------------------------|-----------|
| <b>Figure S1.</b> FT-IR spectra of <b>BCz</b> and <b>FJU-P6</b> .....                                                                                                                                                                  | <b>S2</b> |
| <b>Figure S2.</b> FT-IR spectra of <b>DCzPh</b> and <b>FJU-P7</b> .....                                                                                                                                                                | <b>S2</b> |
| <b>Figure S3.</b> SEM pictures of (a) <b>FJU-P6</b> and (b) <b>FJU-P7</b> .....                                                                                                                                                        | <b>S3</b> |
| <b>Figure S4.</b> PXRD patterns of <b>FJU-P6</b> and <b>FJU-P7</b> .....                                                                                                                                                               | <b>S3</b> |
| <b>Figure S5.</b> TGA curves of <b>FJU-P6</b> and <b>FJU-P7</b> .....                                                                                                                                                                  | <b>S4</b> |
| <b>Figure S6.</b> BET plots for <b>FJU-P6</b> .....                                                                                                                                                                                    | <b>S4</b> |
| <b>Figure S7.</b> BET plots for <b>FJU-P7</b> .....                                                                                                                                                                                    | <b>S4</b> |
| <b>Figure S8.</b> The pore-size distribution (PSD) of <b>FJU-P6</b> and <b>FJU-P7</b> .....                                                                                                                                            | <b>S5</b> |
| <b>Figure S9.</b> CO <sub>2</sub> adsorption isotherms of <b>FJU-P6</b> and <b>FJU-P7</b> at 273 K.....                                                                                                                                | <b>S5</b> |
| <b>Figure S10.</b> DSLF fitting of the vapors sorption data at 294 K on <b>FJU-P6</b> and <b>FJU-P7</b> .....                                                                                                                          | <b>S6</b> |
| <b>Figure S11.</b> IAST selectivities for equivalent C <sub>6</sub> H <sub>6</sub> /C <sub>6</sub> H <sub>12</sub> and C <sub>6</sub> H <sub>10</sub> /C <sub>6</sub> H <sub>12</sub> of <b>FJU-P6</b> and <b>FJU-P7</b> at 294 K..... | <b>S6</b> |
| <b>Table S1.</b> Equation parameters for the DSLF isotherm model.....                                                                                                                                                                  | <b>S6</b> |
| <b>Figure S12.</b> Electrostatic potential maps around of monomers and adsorbates.....                                                                                                                                                 | <b>S7</b> |
| <b>Figure S13.</b> C-H $\cdots\pi$ interaction geometries for monomers with adsorbates.....                                                                                                                                            | <b>S8</b> |

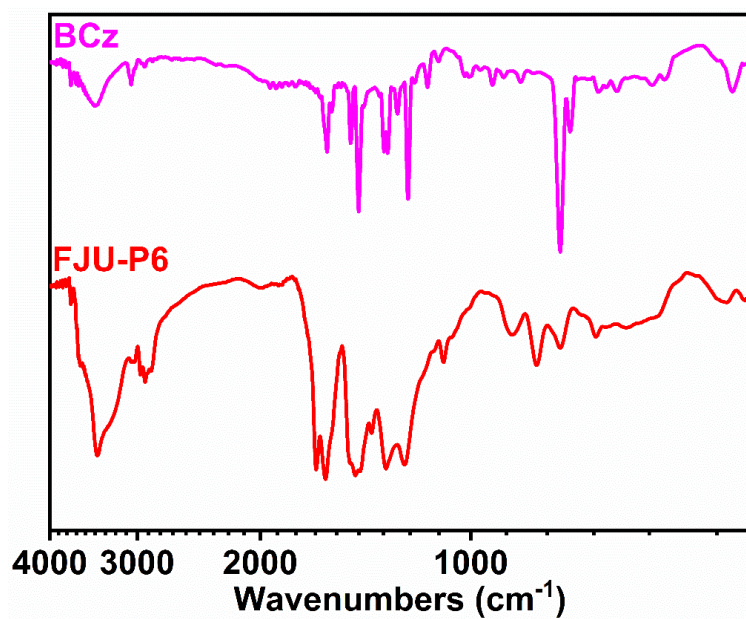

Figure S1. FT-IR spectra of BCz and FJU-P6.

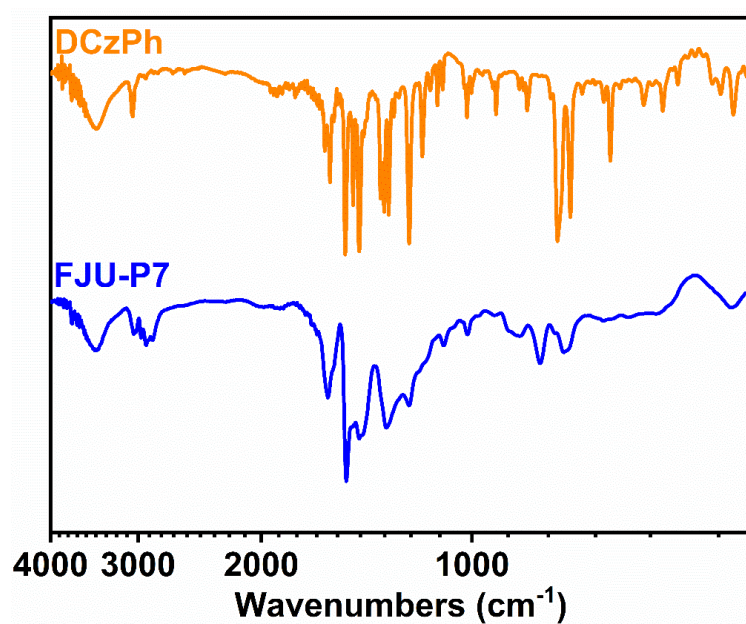

Figure S2. FT-IR spectra of DCzPh and FJU-P7.

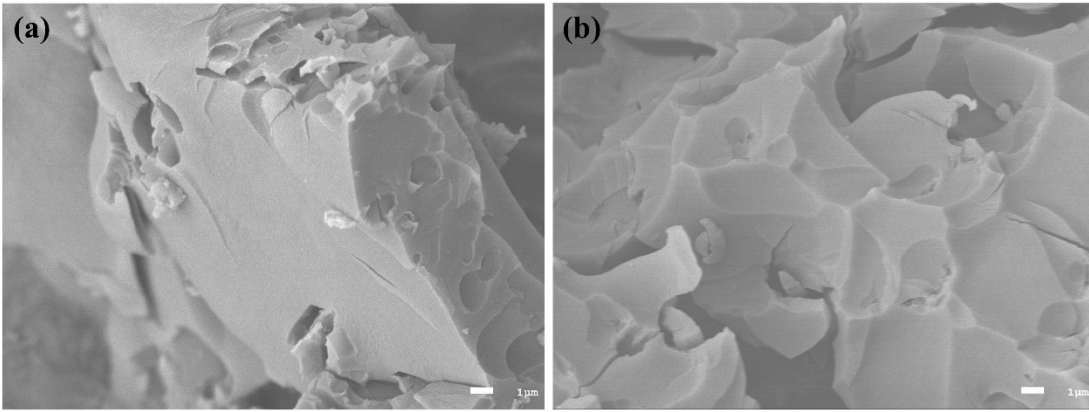

Figure S3. SEM pictures of (a) FJU-P6 and (b) FJU-P7.

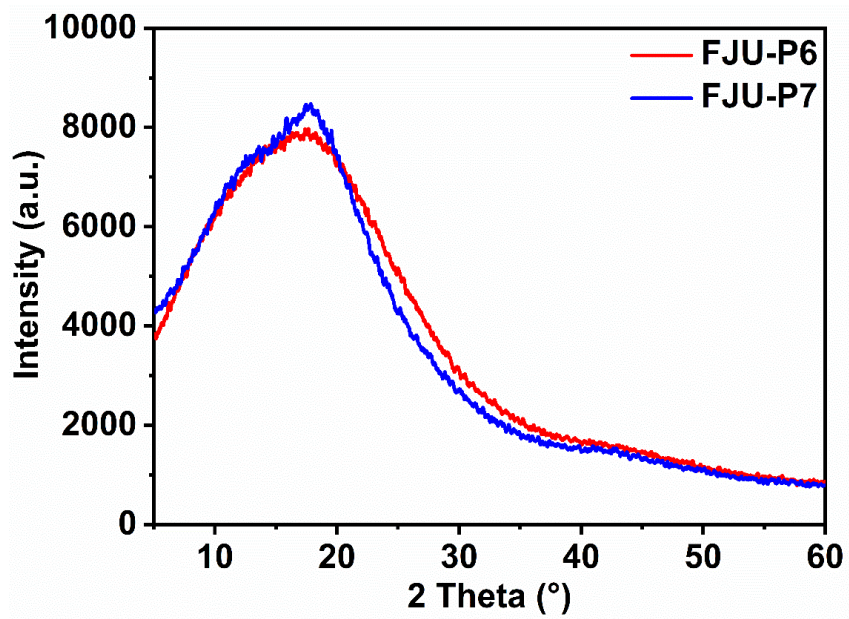

Figure S4. PXRD patterns of FJU-P6 and FJU-P7.

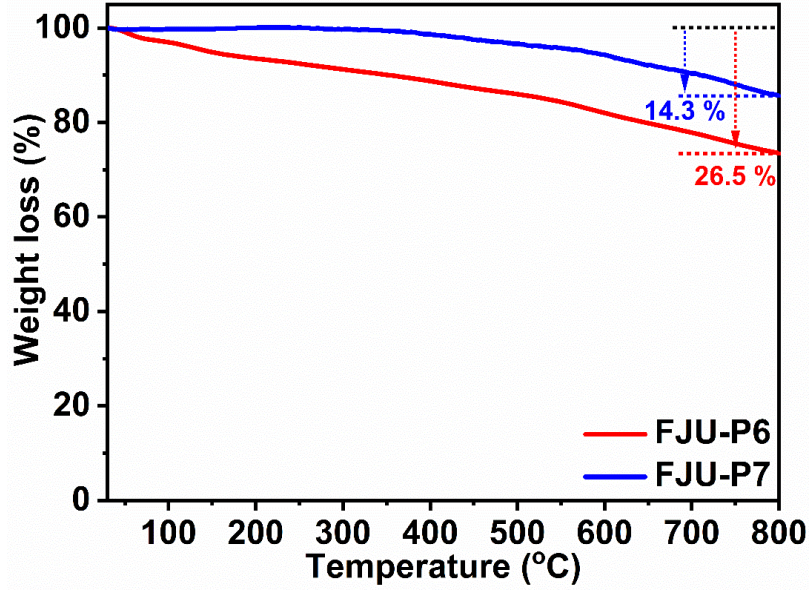

Figure S5. TGA curves of FJU-P6 and FJU-P7.

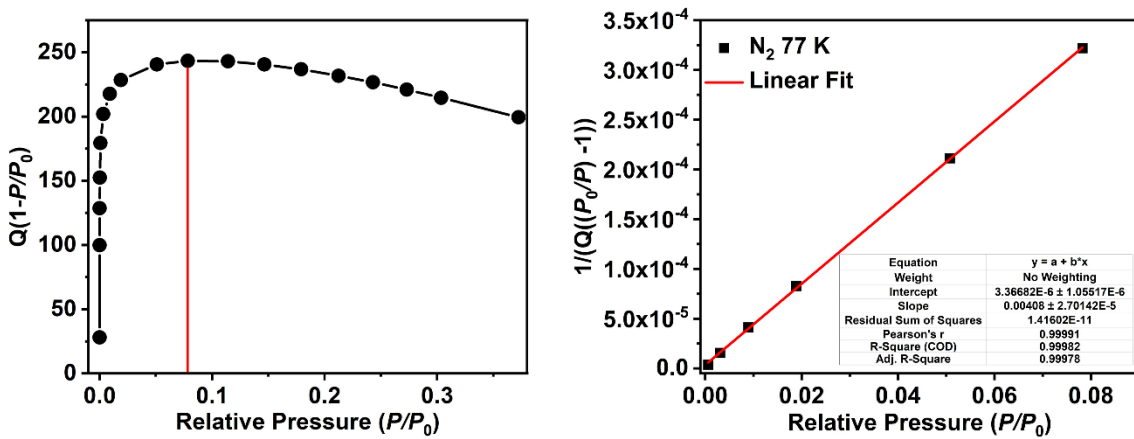

Figure S6. BET plots for FJU-P6. Points are selected based on the first consistency criterion.

$$S_{BET} = 1 / (3.36682 \times 10^{-6} + 0.00408) / 22414 \times 6.023 \times 10^{23} \times 0.162 \times 10^{-18} = 1066 \text{ m}^2 \text{ g}^{-1}$$

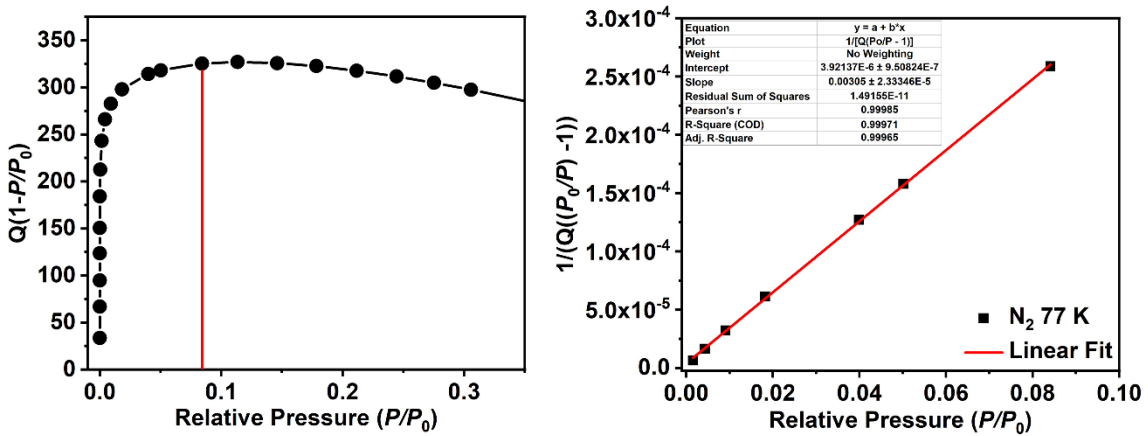

Figure S7. BET plots for FJU-P7. Points are selected based on the first consistency criterion.

$$S_{BET} = 1 / (3.92137 \times 10^{-6} + 0.00305) / 22414 \times 6.023 \times 10^{23} \times 0.162 \times 10^{-18} = 1425 \text{ m}^2 \text{ g}^{-1}$$

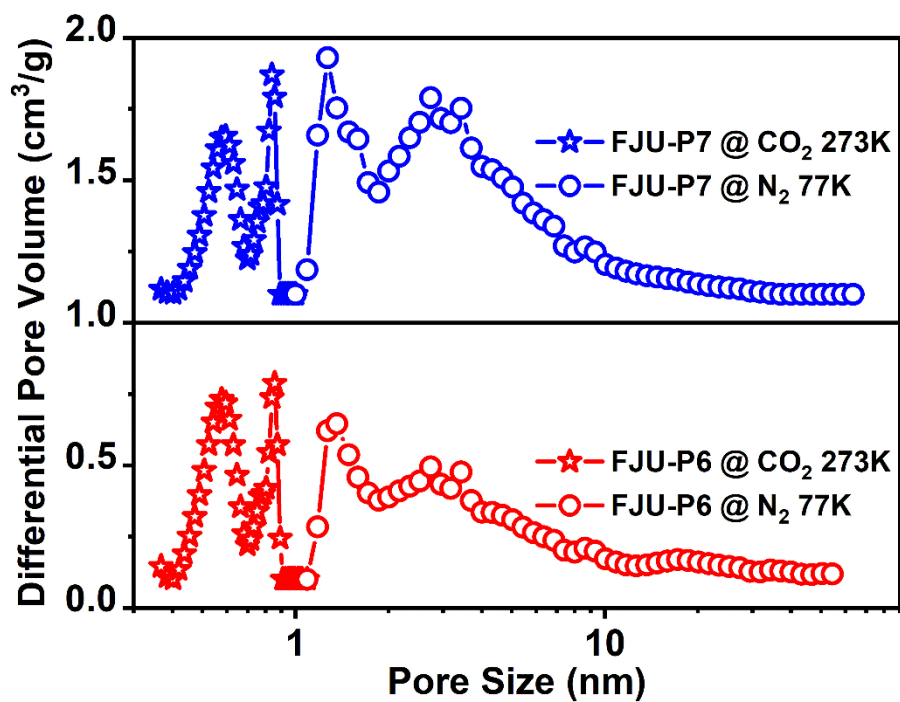

Figure S8. The pore-size distribution (PSD) of FJU-P6 and FJU-P7 from the 273 K CO<sub>2</sub> and 77 K N<sub>2</sub> isotherms based on the no-local density functional theory (NLDFT) model.

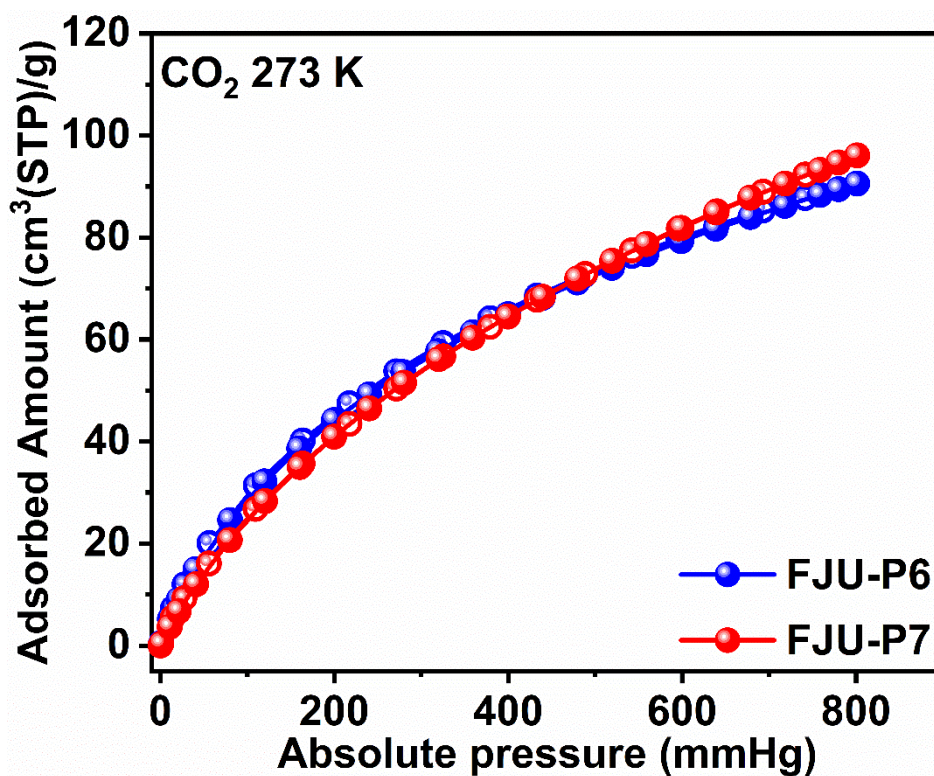

Figure S9. CO<sub>2</sub> adsorption isotherms of FJU-P6 (red) and FJU-P7 (blue) at 273 K.



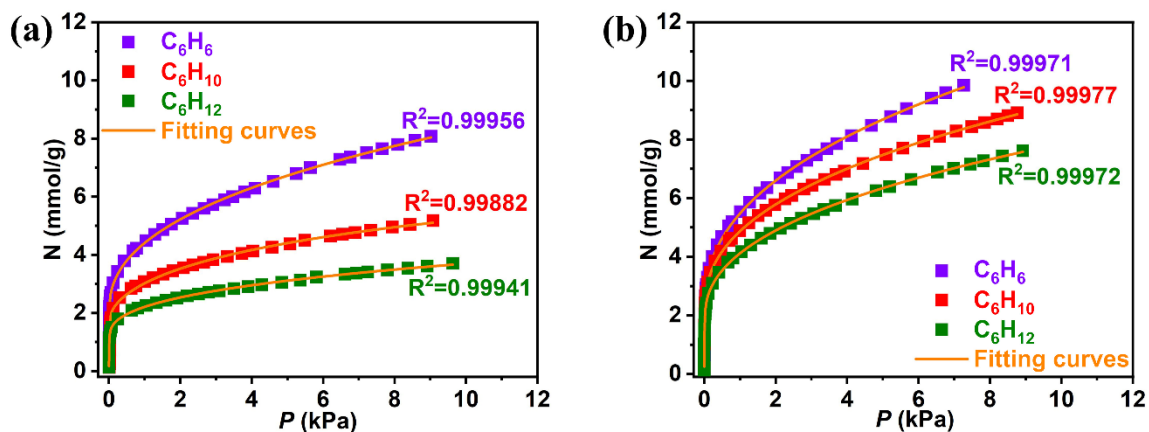

**Figure S10.** DSLF fitting of the  $C_6H_6$  (violet),  $C_6H_{10}$  (red) and  $C_6H_{12}$  (olive) sorption data at 294 K on FJU-P6 (a) and FJU-P7 (b).

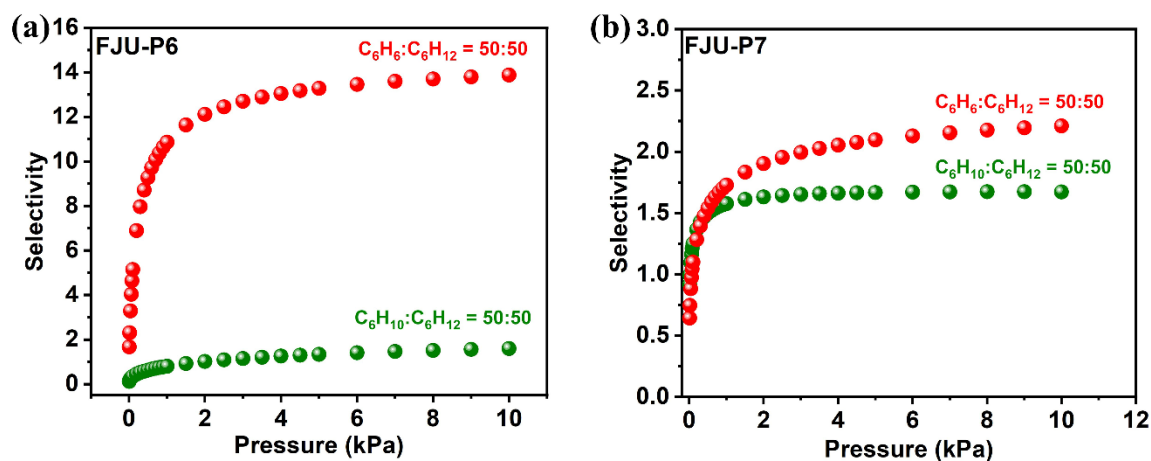

**Figure S11.** IAST selectivities for equivalent  $C_6H_6/C_6H_{12}$  (red) and  $C_6H_{10}/C_6H_{12}$  (olive) of FJU-P6 (a) and FJU-P7 (b) at 294 K.

**Table S1.** Equation parameters for the DSLF isotherm model.

| Polymers | Adsorbates  | $N_1^{max}$<br>(mmol g <sup>-1</sup> ) | $b_1$<br>(kPa <sup>-1</sup> ) | $1/n_1$ | $N_2^{max}$<br>(mmol g <sup>-1</sup> ) | $b_2$<br>(kPa <sup>-1</sup> ) | $1/n_2$ |
|----------|-------------|----------------------------------------|-------------------------------|---------|----------------------------------------|-------------------------------|---------|
| FJU-P6   | benzene     | 2.02758                                | 9122.53765                    | 1.71824 | 212.92323                              | 0.01131                       | 0.42889 |
|          | cyclohexene | 1.68155                                | 3.47291E8                     | 5.64168 | 10.64258                               | 0.14395                       | 0.54079 |
|          | cyclohexane | 1.12413                                | 946.0946                      | 1.24002 | 144.52421                              | 0.00758                       | 0.37874 |
| FJU-P7   | benzene     | 2.24083                                | 10744.94006                   | 2.04497 | 168.13274                              | 0.01962                       | 0.44012 |
|          | cyclohexene | 2.17533                                | 2181.68026                    | 1.56111 | 166.3786                               | 0.01962                       | 0.4296  |
|          | cyclohexane | 1.83063                                | 1685.06854                    | 1.41181 | 219.64403                              | 0.01053                       | 0.42814 |

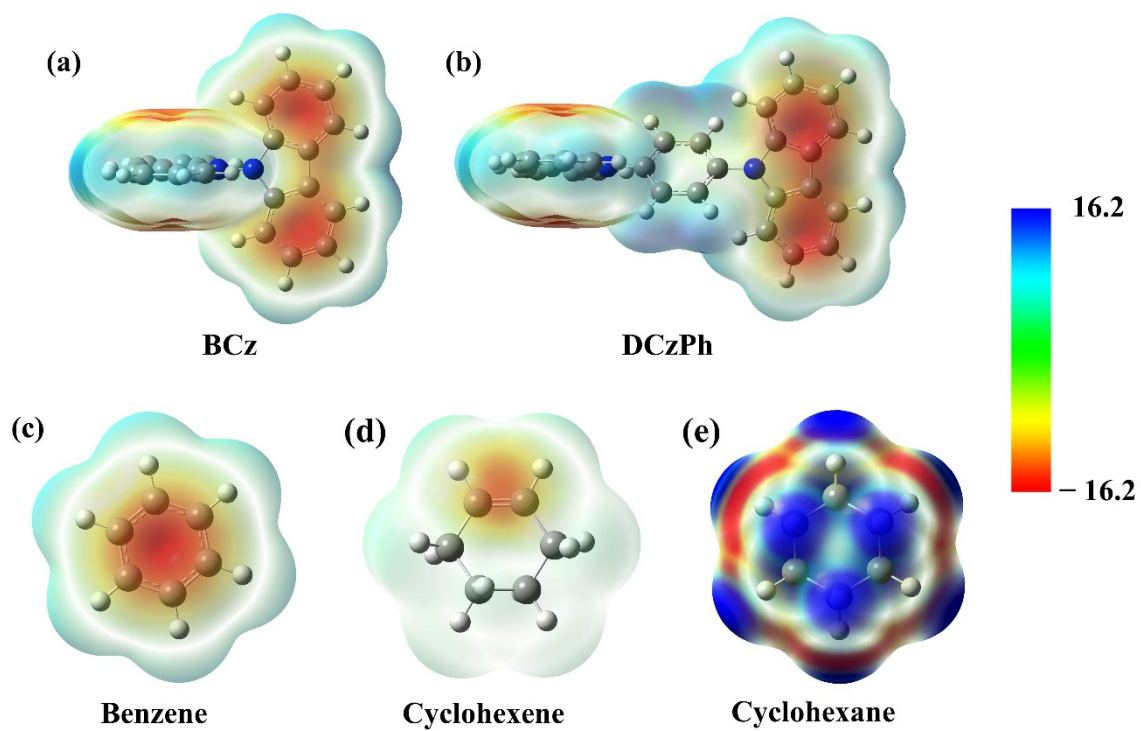

**Figure S12.** Electrostatic potential maps around of (a) **BCz**, (b) **DCzPh**, (c) benzene, (d) cyclohexene and (e) cyclohexane. The gradation on the scale bar is in kcal mol<sup>-1</sup>.

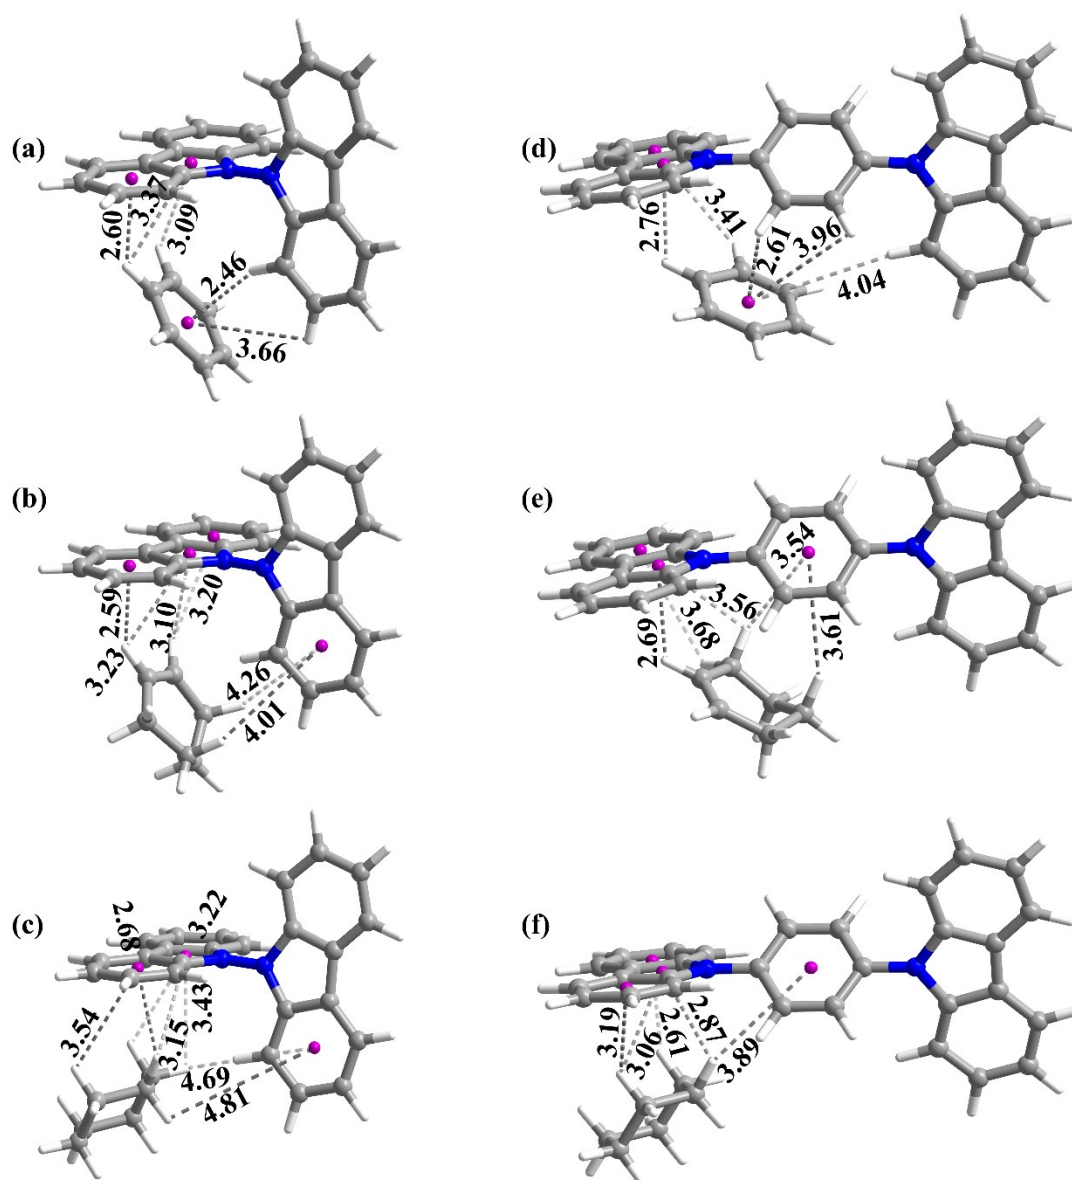

**Figure S13.** C-H $\cdots$  $\pi$  interaction geometries for **BCz** with (a) benzene, (b) cyclohexene, (c) cyclohexane, and **DCzPh** with (d) benzene, (e) cyclohexene, (f) cyclohexane. Dot lines indicate C-H $\cdots$  $\pi$  interactions, the unit of distance is Å. (C gray, N blue, H white, dummy atom: center of the arene ring, violet).
